# Supplementary material for: Inhibition of Larval Development of Marine Copepods Acartia tonsa by Neonicotinoids
Source: MDPI journal article supplement (doi:10.3390/toxics10040158), 2022-03-26
Supplement: s1 [file s1]

# Supplementary Materials: Inhibition of Larval Development of Marine Copepods *Acartia tonsa* by Neonocotinoids

Marco Picone, Gabriele Giuseppe Distefano, Davide Marchetto, Martina Russo, Marco Baccichet, Roberta Zangrando, Andrea Gambaro, Annamaria Volpi Ghirardini

**Table S1.** Linearity ranges, limits of detection (LOD)s, limits of quantification (LOQs) and  $R^2$ , for the studied neonicotinoids.

| Compound | Linearity range<br>(ng mL <sup>-1</sup> ) | LOD<br>(pg mL <sup>-1</sup> ) | LOQ<br>(pg mL <sup>-1</sup> ) | $R^2$  |
|----------|-------------------------------------------|-------------------------------|-------------------------------|--------|
| ACE      | 0.008–1000                                | 2                             | 8                             | 0.9997 |
| IMI      | 0.022–1100                                | 6                             | 22                            | 0.9991 |
| CLO      | 0.049–600                                 | 15                            | 49                            | 0.9857 |
| TCLO     | 0.005–1050                                | 2                             | 5                             | 0.9935 |
| TMX      | 0.061–1200                                | 18                            | 61                            | 0.9965 |

**Table S2.** Summary of the larval mortality (ELS-m) observed in the tested treatments. Data are reported as mean  $\pm$  standard error. Actual concentrations are reported in  $\mu\text{g L}^{-1}$ .

|     | Culture | Concentration | ELS-m           | One-way ANOVA                |
|-----|---------|---------------|-----------------|------------------------------|
| ACE | AT17/20 | Control       | 0.26 $\pm$ 0.03 | $F_{4,28} = 1.81, p = 0.156$ |
|     |         | 0.02          | 0.22 $\pm$ 0.05 |                              |
|     |         | 0.21          | 0.31 $\pm$ 0.04 |                              |
|     |         | 2.30          | 0.39 $\pm$ 0.06 |                              |
|     |         | 21.4          | 0.25 $\pm$ 0.05 |                              |
| CLO | AT19/20 | Control       | 0.20 $\pm$ 0.01 | $F_{4,29} = 2.42, p = 0.072$ |
|     |         | 0.02          | 0.11 $\pm$ 0.01 |                              |
|     |         | 0.08          | 0.26 $\pm$ 0.01 |                              |
|     |         | 1.32          | 0.17 $\pm$ 0.01 |                              |
|     |         | 12.4          | 0.27 $\pm$ 0.01 |                              |
| IMI | AT14/19 | Control       | 0.13 $\pm$ 0.04 | $F_{4,31} = 0.97, p = 0.439$ |
|     |         | 0.02          | 0.28 $\pm$ 0.13 |                              |
|     |         | 0.14          | 0.18 $\pm$ 0.04 |                              |
|     |         | 1.01          | 0.25 $\pm$ 0.08 |                              |
|     |         | 10.1          | 0.13 $\pm$ 0.06 |                              |
| THI | AT18/20 | Control       | 0.26 $\pm$ 0.06 | $F_{4,28} = 1.48, p = 0.239$ |
|     |         | 0.03          | 0.45 $\pm$ 0.10 |                              |
|     |         | 0.14          | 0.19 $\pm$ 0.03 |                              |
|     |         | 1.13          | 0.17 $\pm$ 0.06 |                              |
|     |         | 11.0          | 0.26 $\pm$ 0.09 |                              |
| TMX | AT18/20 | Control       | 0.17 $\pm$ 0.07 | $F_{4,29} = 2.57, p = 0.059$ |
|     |         | 0.01          | 0.32 $\pm$ 0.04 |                              |
|     |         | 0.16          | 0.33 $\pm$ 0.06 |                              |
|     |         | 1.01          | 0.29 $\pm$ 0.05 |                              |
|     |         | 11.0          | 0.26 $\pm$ 0.02 |                              |

**Table S3.** Summary of the larval development ratio (LDR) observed in the tested treatments. Actual concentrations are reported in  $\mu\text{g L}^{-1}$ . Data are reported as mean  $\pm$  standard error. Significant differences ( $p < 0.05$ ) as compared with control are highlighted in bold.

|     | Culture | Concentration | LDR                               | One-way ANOVA                 | Dunnet's <i>post-hoc</i> test    |
|-----|---------|---------------|-----------------------------------|-------------------------------|----------------------------------|
| ACE | AT17/20 | Control       | $0.36 \pm 0.02$                   | $F_{4,28} = 31.53, p < 0.001$ | -                                |
|     |         | 0.02          | $0.25 \pm 0.01$                   |                               | $p = 0.094$                      |
|     |         | 0.21          | $0.28 \pm 0.01$                   |                               | $p = 0.271$                      |
|     |         | 2.30          | <b><math>0.08 \pm 0.01</math></b> |                               | <b><math>p &lt; 0.001</math></b> |
|     |         | 21.4          | <b><math>0.02 \pm 0.01</math></b> |                               | <b><math>p &lt; 0.001</math></b> |
| CLO | AT19/20 | Control       | $0.48 \pm 0.03$                   | $F_{4,29} = 22.15, p < 0.001$ | -                                |
|     |         | 0.02          | $0.43 \pm 0.05$                   |                               | $p = 0.358$                      |
|     |         | 0.08          | $0.38 \pm 0.08$                   |                               | $p = 0.144$                      |
|     |         | 1.32          | <b><math>0.27 \pm 0.05</math></b> |                               | <b><math>p &lt; 0.001</math></b> |
|     |         | 12.4          | <b><math>0.03 \pm 0.01</math></b> |                               | <b><math>p &lt; 0.001</math></b> |
| IMI | AT14/19 | Control       | $0.64 \pm 0.01$                   | $F_{4,31} = 29.20, p < 0.001$ | -                                |
|     |         | 0.02          | $0.61 \pm 0.02$                   |                               | $p = 0.485$                      |
|     |         | 0.14          | <b><math>0.53 \pm 0.02</math></b> |                               | <b><math>p = 0.008</math></b>    |
|     |         | 1.01          | <b><math>0.53 \pm 0.04</math></b> |                               | <b><math>p = 0.017</math></b>    |
|     |         | 10.1          | <b><math>0.27 \pm 0.05</math></b> |                               | <b><math>p &lt; 0.001</math></b> |
| THI | AT18/20 | Control       | $0.49 \pm 0.04$                   | $F_{4,28} = 13.72, p < 0.001$ | -                                |
|     |         | 0.03          | $0.46 \pm 0.02$                   |                               | $p = 0.632$                      |
|     |         | 0.14          | $0.40 \pm 0.03$                   |                               | $p = 0.167$                      |
|     |         | 1.13          | <b><math>0.34 \pm 0.06</math></b> |                               | <b><math>p = 0.023</math></b>    |
|     |         | 11.0          | <b><math>0.03 \pm 0.01</math></b> |                               | <b><math>p &lt; 0.001</math></b> |
| TMX | AT18/20 | Control       | $0.42 \pm 0.06$                   | $F_{4,27} = 8.44, p < 0.001$  | -                                |
|     |         | 0.01          | $0.33 \pm 0.03$                   |                               | $p = 0.322$                      |
|     |         | 0.16          | $0.34 \pm 0.04$                   |                               | $p = 0.331$                      |
|     |         | 1.01          | <b><math>0.22 \pm 0.07</math></b> |                               | <b><math>p = 0.005</math></b>    |
|     |         | 11.0          | <b><math>0.09 \pm 0.03</math></b> |                               | <b><math>p &lt; 0.001</math></b> |
